# Supplementary material
Source: publisher figshare collection journal article supplement (https://geolsoc.figshare.com/ndownloader/files/3627228)
Supplement: Supplementary file 1 [file 3627228]

"Panarea - Major, trace element and isotopic compositions. Major elements have been normalised to 100% on a LOI-free basis.",,,,,,,,,,,,,,,,,,,,,,,,,,,,,,,,,,,,,,,,,,,,,,,,,,
Sample,Eruptive epoch,Rock type,SiO2,TiO2,Al2O3,Fe2O3,MnO,MgO,CaO,Na2O,K2O,P2O5,LOI,Ba,Rb,Sr,Y,Zr,Nb,Ni,Co,Cr,V,La,Ce,Pr,Nd,Sm,Eu,Gd,Tb,Dy,Ho,Er,Tm,Yb,Lu,Ta,Hf,Sc,Cs,Pb,Th,U,87Sr/86Sr,143Nd/144Nd,206Pb/204Pb,207Pb/204Pb,208Pb/204Pb,Data Source
PN283,1a,Punta Muzza lava,63.3,0.56,16.04,5.42,0.1,2.72,5.84,3,2.86,0.16,0.5,549,99,456,26,135,10,13,11,25,137,22.5,50,,22.1,4.82,1.01,,0.54,,,,,2.1,0.31,0.61,3.61,17.7,3.2,,9.4,3.4,,,,,,Calanchi et al. 2002
PN289,1a,Grotta Tabacco lava,61.49,0.58,16.58,5.07,0.1,3.48,7.24,3,2.3,0.16,1.59,486,83,510,26,131,10,17,16,31,176,18,44.9,,21.3,4.81,0.99,,0.51,,,,,2.1,0.33,0.53,3.13,21.5,2.8,,8.2,3.5,0.70555,,,,,Calanchi et al. 2002
PN200,1b, Cala Bianca neck,63.77,0.65,16.56,5.3,0.13,2.65,5.99,2.65,2.15,0.15,1.86,388,43,324,38,109,5,8,17.4,20,171,25.6,45.4,,20.9,4.05,1.03,3.67,0.55,,,,,2.17,0.4,0.45,3.32,23.9,3.8,,8.5,4.6,,,,,,Calanchi et al. 2002
PN295,1b,Cala Bianca lava,59.98,0.6,16.78,7.09,0.1,2.65,7.47,2.84,2.31,0.18,1.08,430,70,503,24,108,8,10,14,13,193,17.5,42.1,,20.2,4.35,0.94,,0.48,,,,,2.14,0.3,0.43,2.82,22.6,1.6,,6.7,2,,,,,,Calanchi et al. 2002
PN304,1c,Pt.Falcone lava Dome,66.61,0.52,15.2,4.82,0.11,1.73,4.31,3.32,3.25,0.13,1.98,563,111,372,26,145,10,7,9,9,96,23.2,48.3,,22.3,4.46,0.93,,0.53,,,,,2.2,0.36,0.6,3.88,13.3,4.2,,11,3.6,0.7054,,,,,Calanchi et al. 2002
PN11,1c,Castello lava (Castello fm.),66.95,0.49,15.39,4.62,0.11,2.33,3.75,3.43,2.85,0.08,2.62,595,102,390,27,139,10,6,9.1,13,113,24.4,45.1,,18.8,3.44,0.96,3.15,0.54,,,,,2.2,0.3,0.53,4.21,15.4,4.3,,11.9,4,0.70519,,,,,Calanchi et al. 2002
PS27A,1c,Panarelli lava (Dattilo fm.),51.62,0.86,18.27,7.51,0.15,5.24,9.59,4.02,2.52,0.22,0.38,902,62,539,23,92,18,22,,,213,,,,,,,,,,,,,,,,,,,,,,,,,,,Calanchi et al. 2002
PS30,1c,Panarelli lava (Dattilo fm.),52.81,0.81,16.9,7.69,0.11,6.8,10.19,2.56,1.91,0.23,2.16,609,42,425,19,71,12,45,23,210,127,17.8,40.8,,19.1,4.09,1.01,,0.48,,,,,1.9,0.27,0.71,2.56,36.3,1.6,,4.9,0.4,,,,,,Calanchi et al. 2002
PS31A,1c,Panarelli lava (Dattilo fm.),52.86,0.74,17.55,7.26,0.14,6.58,10.1,2.34,2.28,0.15,2.97,593,57,425,20,81,10,43,23,13,261,19.8,35.8,,17.8,3.65,1.1,3.28,0.52,,,,,1.62,0.25,1.08,3.02,23,1.7,,5.4,1.7,0.7057,,19.185,15.678,39.132,Calanchi et al. 2002
PN201,1c,Panarelli lava (Dattilo fm.),66.81,0.5,15.31,4.68,0.11,2.27,4.02,3.13,3.07,0.1,2.29,510,106,355,20,160,11,8,10.9,26,106,27.8,49,,20.6,3.56,0.91,3.37,0.5,,,,,1.96,0.32,0.61,3.54,15.8,2.8,,12.5,3.2,0.70534,,,,,Calanchi et al. 2002
PS25,1c,Dattilo lava  (Dattilo fm.),59.79,0.66,16.08,7.45,0.11,3.8,6.26,2.73,2.98,0.14,4.9,617,106,396,35,101,12,49,18.4,192,164,25.5,47.8,,20.9,4.29,1.16,4.47,0.69,,,,,2.22,0.33,0.71,3.45,26.6,2.6,,10,3.8,0.705,0.512729,,,,Calanchi et al. 2002
PN202A,1c,Lisca Nera lava (Lisca Bianca fm.),64.28,0.62,15.86,5.36,0.12,2.69,5.76,2.26,2.91,0.14,1.99,520,104,383,23,125,14,10,11,110,152,26.3,47,,20.2,3.92,0.96,3.82,0.58,,,,,1.93,0.28,0.57,3.59,22.2,5,,11.1,2.3,0.7055,,,,,Calanchi et al. 2002
PS4,1c,Lisca Bianca lava (Lisca Bianca fm.),65.81,0.49,16.21,4.62,0.11,2.35,4.34,3.09,2.87,0.11,2.98,594,109,352,20,107,9,10,10,65,134,29.3,52.5,,19.7,3.97,0.87,3.52,0.5,,,,,1.87,0.32,0.57,3.65,18.7,5.3,,12.2,2.8,0.70521,,,,,Calanchi et al. 2002
DPL,1c,Palisi lava,63.5,0.56,15.33,6.4,0.13,3,5.42,2.72,2.8,0.15,1.46,522,95,408,20,129,9,12,14.1,44,141,27.9,50.8,,20.5,4.2,1,3.5,0.6,,,,,2.2,0.3,0.6,3.6,,,,10.1,,,,,,,Cimarelli et al. 2008
FSS,1c,La Fossa lava,66.8,0.57,15.46,5.2,0.1,1.65,3.83,3.28,2.97,0.13,1.07,651,103,358,20,145,9,,9.7,,109,26.9,48.9,,18.8,4,0.9,3.1,0.5,,,,,2.2,0.3,0.6,4.2,,,,11.8,,,,,,,Cimarelli et al. 2008
TR1,1c,P.Tribunale plug,69.84,0.61,15.39,3.66,0.07,1.36,3.04,2.84,3.08,0.13,2.97,538,103,300,86,138,9,,16.7,,,22.4,39.8,,15.6,4.4,1.3,5.8,1.2,,,,,9.8,1.6,0.6,,,,,13.4,,,,,,,Cimarelli et al. 2008
PS27B,1c,Panarelli (Dattilo fm.) Lithic xenolith,50.29,0.82,18.28,6.94,0.16,5.84,12.2,2.33,2.93,0.21,6.46,961,72,559,22,99,18,29,,,176,,,,,,,,,,,,,,,,,,,,,,0.70561,,,,,"Calanchi et al., 1999b"
PN202B,1c,Lisca Nera (Lisca Bianca fm.) lithic xenolith,54.48,0.77,16.32,7.91,0.14,6.17,10.13,2.01,1.89,0.18,2.15,484,50,414,23,81,14,38,22,379,227,18.4,39.2,,18.9,3.9,1.11,3.95,0.61,,,,,2.12,0.31,0.59,2.5,41.6,7.8,,4.9,0.5,0.70537,,,,,Calanchi et al. 2002
LB,1c,Lisca Bianca (Lisca Bianca fm.)  lithic xenolitrh,55.07,1.11,16.28,8.32,0.13,6.2,7.99,2.29,2.58,0.03,3.57,1291,107,290,12,112,18,41,,,241,,,,,,,,,,,,,,,,,,,,,,,,,,,"Calanchi et al., 1999b"
PA2,1c,Pt.Falcone lava ,67.61,0.51,16.14,4.54,0.11,1.32,3.54,3.06,3.01,0.16,1.44,604,113,365,29,153,8,7,9,12,106,19.1,53.9,,22.8,4.07,0.98,3.81,0.57,,,,,2.16,0.34,0.59,4.3,15.7,4.7,,12.2,4.4,,,,,,Calanchi et al. 2002
PS6,1c,Lisca Bianca (Lisca Bianca fm.) lithic xenolith,55.75,0.96,18.05,7.29,0.12,4.03,7.12,2.63,3.89,0.16,2.81,999,117,453,14,110,20,29,18,26,200,16.8,33.7,,13.8,2.82,0.9,2.2,0.4,,,,,1.37,0.2,1.05,2.91,21,4.7,,6.5,1.2,0.70573,,,,,Calanchi et al. 2002
LAV1,2,Mafic enclave in Punta Cardosi lava dome ,55.94,0.65,17.25,8.78,0.15,4.6,8.76,2.14,1.58,0.15,1.31,314,43,521,22,84,9,10,22.3,,160,17.9,31.7,,18.3,3.5,1,3,0.5,,,,,1.9,0.2,0.2,2,,,,6.1,,,,,,,Cimarelli et al. 2008
PN329,2,Castello lava (Castello fm.),61.17,0.55,15.98,6.95,0.11,3.36,6.63,2.55,2.53,0.17,0.9,495,84,475,26,123,9,21,17,35,173,25.9,56.4,,25.7,4.89,0.95,,0.53,,,,,2.38,0.34,0.54,3.14,21,2.6,,8,2.7,,,,,,Calanchi et al. 2002
PA57,2,Castello dome (Castello fm.),68.18,0.51,15.57,4.83,0.11,1.13,4.36,2.12,3.04,0.15,1.83,576,105,365,28,146,7,9,11,13,117,27.3,49.9,,21.6,4.01,0.96,4.04,0.57,,,,,2.26,0.34,0.56,3.81,17.2,4.2,,11.1,4.2,0.70539,,,,,Calanchi et al. 2002
PN19,2,Castello lava fragment,60.9,0.6,17.09,6.99,0.12,3.32,6.11,2.62,2.11,0.14,1.23,418,80,479,24,107,7,10,19,23,193,22,40,,17.7,3.67,1.01,3.03,0.46,,,,,2.06,0.32,0.48,2.92,25.5,3.5,,7.6,3.7,0.70536,0.51256,,,,Calanchi et al. 2002
PA80,2,Punta Cardosi lava,60.28,0.61,17.32,7.14,0.12,3.34,6.42,2.69,1.96,0.12,0.9,492,72,489,26,122,8,12,18.5,25,213,23.3,39.7,,17.8,3.73,1.02,3.65,0.55,,,,,2.05,0.32,0.45,3,28.1,1.5,,7.4,3.5,0.70529,,,,,Calanchi et al. 2002
PN5,2,Soldata pyroclastic bomb,57.41,0.64,17.98,8.44,0.13,3.71,7.31,2.68,1.58,0.12,3.62,409,53,441,22,89,7,13,21.5,23,228,19.8,38,,19,3.89,1.05,3.79,0.56,,,,,1.97,0.31,0.36,2.62,29,2.5,,6.5,4,0.70491,0.512579,19.233,15.68,39.142,Calanchi et al. 2002
PN262,2,Soldata lava,59.82,0.64,15.44,7.87,0.15,3.29,7.46,2.92,2.26,0.15,2.38,424,73,539,22,95,9,22,19,49,182,18.5,43.1,,22.2,4.35,0.97,,0.53,,,,,2.08,0.31,0.45,2.73,22.6,2.8,,6.9,2.1,,,,,,Calanchi et al. 2002
DPP,2,Soldata pyroclastics bomb,58.73,0.64,17.1,7.79,0.14,3.77,7.48,2.33,1.85,0.16,2.18,356,49,488,20,102,6,21,19.2,,179,22.5,41.4,,19.1,4,1.1,3.6,0.6,,,,,2.1,0.3,0.4,3.1,,,,7.3,,,,,,,Cimarelli et al. 2008
BB2,2,Soldata pyroclasticsbomb,59.31,0.62,16.74,7.62,0.14,3.55,7.25,2.49,2.12,0.15,0.74,408,58,461,23,104,10,6,18.8,,150,23.2,41.9,,19.3,3.7,1,3.5,0.6,,,,,2.1,0.3,0,2.4,,,,7.4,,,,,,,Cimarelli et al. 2008
DCB,2,Soldata pyroclastics bomb,62.06,0.58,15.86,6.74,0.14,3.14,5.99,2.76,2.59,0.15,1.32,498,77,411,21,122,11,11,18.7,69,119,26.6,51.9,,20.2,4.7,1.2,4.5,0.7,,,,,2.2,0.3,0.5,,,,,9.2,,,,,,,Cimarelli et al. 2008
PCLD,2,Punta Cardosi dome,65.76,0.57,16.14,5.49,0.12,1.84,3.99,3.05,2.91,0.13,1.85,603,96,354,22,143,9,41,15.5,,,28.7,57.3,,20.8,4.3,1.1,4.3,0.6,,,,,2.3,0.4,0.6,,,,,11.3,,,,,,,Cimarelli et al. 2008
PN8,2 (?),Lithic in Soldata pyroclastics ,65.34,0.56,15.69,5.56,0.1,2.15,4.56,3.23,2.68,0.13,1.64,567,97,384,29,131,9,9,12.9,20,145,26.6,47.9,,22.1,4.22,1.04,3.91,0.63,,,,,2.27,0.33,0.54,3.74,19.6,4.3,,10.3,4.9,0.70541,,,,,Calanchi et al. 2002
PN315,3,Punta Falcone-2 scoria,51.75,0.61,18.93,9.67,0.15,6.1,10.08,1.98,0.59,0.14,8.19,246,28,580,20,63,5,32,37,68,261,14.5,35,,16.5,3.92,1.33,,0.57,,,,,1.98,0.27,0.35,1.78,41,0.9,,3.9,0.4,,,,,,Calanchi et al. 2002
PN315a,3,Punta Falcone-2 scoria,51.49,0.62,18.91,9.73,0.15,6.12,10.21,1.99,0.63,0.15,7.57,281,26,656,19,58,4.1,,,,247,17,33,4,19,4.2,1.08,3.89,0.51,3.33,0.68,1.86,0.26,1.61,0.28,0.23,1.27,,0.76,5,3.9,0.56,,,,,,Peccerillo et al. 2013
PF1,3,Punta Falcone-2 scoria,51.81,0.63,17.33,9.81,0.16,6.33,10.37,2.57,0.91,0.08,1.26,319,21,593,13,40,3.1,27,33,115,251,11,23,2.6,12,3.2,0.84,1.68,0.34,2.35,0.46,1.41,0.22,1.26,0.25,0.16,1.02,41.4,0.64,5.2,2.14,0.61,0.70441,0.512837,19.43,15.71,39.36,Calanchi et al. 2002; Peccerillo et al. 2013
PN15,3,Punta Falcone-2 scoria,53.58,0.66,17.82,9.78,0.15,5.1,9.39,2.47,0.96,0.09,2.98,305,23,581,13,43,3,30,32,111,277,13.3,25.4,,12.6,2.88,0.92,2.69,0.43,,,,,1.58,0.28,0.2,1.39,42,0.9,,3,1.8,0.70404,,,,,Calanchi et al. 2002
PN255,3,Punta Falcone-2 scoria,54.38,0.66,16.21,10.17,0.18,6.37,8.94,2,0.99,0.1,3.46,302,27,539,14,41,6,30,26,53,249,13.5,31.3,,14.9,3.67,0.77,,0.5,,,,,1.66,0.22,0.16,1.23,32.3,0.6,,3.1,0.2,,,,,,Calanchi et al. 2002
PFS1,3,Punta Falcone-2 scoria,52.23,0.57,16.69,9.39,0.18,7.12,10.9,1.83,0.96,0.13,1.02,245,22,534,13,54,4,47,31.6,116,240,11,19.8,,10.2,2.5,0.8,2.5,0.4,,,,,1.4,0.2,0.1,1.3,,,,3,,,,,,,"Cimarelli et al., 2008"
21-10a,4.1,p1 layer (pumices),54.47,0.84,17.09,10.06,0,2.09,6.15,3.91,5.4,,,,,,,,,,,,,,,,,,,,,,,,,,,,,,,,,,,,,,,"Morche, 1988"
21-10b,4.1,p1 layer (pumices),77.59,0.09,12.6,1.34,0,0,1.31,2.64,4.42,,,,,,,,,,,,,,,,,,,,,,,,,,,,,,,,,,,,,,,"Morche, 1988"
PS11A,4.2,Basiluzzo Enclave,52.7,0.93,17.94,9.28,0.16,4.27,9.14,2.52,2.47,0.59,0.86,1199,82,893,21,127,22.2,18,26,3,341,38,71,7.4,34,6.49,1.74,5.15,0.76,3.87,0.73,2.03,0.27,1.64,0.26,0.91,3.16,32.5,3.92,13.9,11.96,3.13,0.70567,,,,,Calanchi et al. 2002; Peccerillo et al. 2013
PS11B,4.2,Basiluzzo Enclave,55.29,0.86,17.51,8.62,0.15,4.04,7.83,3.27,2.04,0.39,1.23,829,69,679,25,118,20,17,25.2,15,216,43.3,79,,33.6,6.12,1.69,4.84,0.71,,,,,2.18,0.31,0.86,3.52,27.1,3.9,,13.7,6,0.70541,0.512619,,,,
PS14,4.2,Basiluzzo Lava,71.53,0.28,14.55,1.88,0.09,0.58,2.27,4.21,4.6,0.01,3.03,885,151,289,17,138,17,1,2.5,2,26,47,77,,24.3,3.64,0.85,3.59,0.47,,,,,1.85,0.27,1.13,4.47,4,8.9,,29.8,9.3,0.70553,0.512587,19.186,15.682,39.163,Calanchi et al. 2002
A4,4.3,Drauto pumices (p2-3),60.29,0.92,18.21,7.13,0.14,1.47,2.81,3.92,4.78,0.33,5.67,1680,154,411,0,302,0,16,,14,80,,,,,,,,,,,,,,,,,,,,,,,,,,,Unpublished
PN386,4.3,Drauto pumices (p2-3),60.85,0.95,17.43,5.99,0.16,1.3,3.2,4.46,5.35,0.31,2.97,1868,162,391,0,326,0,15,,9,52,,,,,,,,,,,,,,,,,,,,,,,,,,,Unpublished
PN379,4.3,Drauto pumices (p2-3),63.86,0.36,15.66,3.96,0.13,1.27,8.14,3.65,2.83,0.13,7.22,632,68,511,0,119,0,16,,14,48,,,,,,,,,,,,,,,,,,,,,,,,,,,Unpublished
607a,4.3,Drauto pumices (p2-3),59.97,0.69,17.88,5.78,0.15,2.35,5.76,3.77,3.36,0.29,3.92,961,106,505,0,230,0,21,,28,111,,,,,,,,,,,,,,,,,,,,,,,,,,,Unpublished
PS3,Not classified,Formiche lava,57.7,0.67,16.55,6.55,0.13,5.57,7.88,2.26,2.56,0.13,0.6,537,86,404,23,91,11,36,26.2,81,205,20.2,38.5,,17.6,3.53,1.03,3.21,0.52,,,,,1.92,0.29,0.7,2.88,33.6,2.3,,7.1,3.1,,,,,,Calanchi et al. 2002
PS22,Uncertain,Submarine Secca dei Pesci,56.66,0.8,17.55,7.91,0.14,4.39,6.84,2.99,2.52,0.2,1.08,497,56,318,19,76,6,16,21.2,2,217,27,51.3,,24.5,5.07,1.19,5.81,0.69,,,,,2.55,0.39,0.45,3.71,28.6,1.6,,8,1.8,0.70534,,,,,Calanchi et al. 2002
E85-2,Uncertain,Submarine Lisca Nera,55,0.87,17.8,9.03,0.15,3.89,8.62,2.8,1.61,0.23,1.11,525,50,583,27,105,18,18,21,60,260,35.1,63.3,,29,5.49,1.49,4.65,0.7,,,,,2.16,0.34,0.61,3.01,20.2,3.3,,11.9,2.3,0.70525,,,,,Calanchi et al. 2002
E85-5,Uncertain,Submarine Lisca Nera,64.35,0.73,16.16,5.56,0.12,2.06,5.62,3.08,2.18,0.14,2.86,436,80,429,26,126,9,3,13.5,28,169,25.4,49.4,,20.4,4.73,1.16,4.47,0.71,,,,,2.65,0.44,0.35,3.65,24.8,2.9,,7.7,2.4,0.7046,,,,,Calanchi et al. 2002
,,,,,,,,,,,,,,,,,,,,,,,,,,,,,,,,,,,,,,,,,,,,,,,,,,
"From: Lucchi, F., Peccerillo, A., Keller, J., Tranne, C. A. & Rossi, P. L. (eds) 2013. The Aeolian Islands Volcanoes. Geological Society, London, Memoirs, 37.  � The Geological Society of London 2013.",,,,,,,,,,,,,,,,,,,,,,,,,,,,,,,,,,,,,,,,,,,,,,,,,,
